# Supplementary material for: Deep self-reconstruction of CoF2 to hierarchically defective Co(OH)2 nanosheets for electrocatalytic reduction of nitrate to ammonia
Source: Royal Society of Chemistry journal article supplement (doi:10.1039/d4qi02278e), 2024-01-01
Supplement: d4qi02278e1.pdf [file d4qi02278e1.pdf]

## Electronic Supplementary Information

### Experimental section

**Materials:** Copper foam (CF) with high purity was provided by Tianjin Gaossunion Photoelectric Technology Co., Ltd. Sulfanilamide was purchased from Shanghai Macklin Biochemical Technology Co., Ltd.  $C_{12}H_{14}N_2 \cdot 2HCl$  was purchased from Shanghai J&K Scientific Technology Co., Ltd. Salicylic acid, urea, sodium citrate,  $C_5FeN_6Na_2O \cdot 2H_2O$ ,  $Co(NO_3)_2 \cdot 6H_2O$ ,  $H_3PO_4$ , NaOH,  $NH_4Cl$ , and  $NaNO_3$  were purchased from Shanghai Aladdin Reagent Co., Ltd.  $C_2H_5OH$ ,  $HNO_3$ , HCl, and NaClO were obtained from Chengdu Kelon Chemicals Co., Ltd. Ultrapure  $H_2O$  with a resistivity of  $18\text{ M}\Omega \cdot \text{cm}^{-1}$  was used throughout the experiments.

**Synthesis of  $CoF_2$  NS/CF:** CF was cleaned ultrasonically using deionized water and absolute ethyl alcohol followed by drying in an oven at  $60^\circ\text{C}$ .  $CoF_2$  NS/CF was prepared in two steps. First, 2 mmol of  $Co(NO_3)_2 \cdot 6H_2O$  and 10 mmol of  $CO(NH_2)_2$  were dissolved in 35 mL of  $H_2O$ . Subsequently, the resulting solution was transferred into a 50-mL Teflon autoclave, into which a piece of CF was introduced. The autoclave was sealed and subjected to heat treatment at  $120^\circ\text{C}$  for 6 h in an oven. In the second step, the precursor material was fluorinated in a tube furnace under Ar gas protection.<sup>1</sup> Specifically, 1.5 g of  $NH_4F$  and the precursor were strategically positioned upstream and downstream of the heating zone in the furnace, respectively. The annealing process involved heating to  $350^\circ\text{C}$  at a controlled rate of  $5^\circ\text{C} \cdot \text{min}^{-1}$ , maintaining this temperature for 2 h, and allowing it to cool naturally to room temperature.

**Synthesis of electrodeposited  $Co(OH)_2$  NS/CF:** Electrodeposition was carried out in a 0.5 M  $Co(NO_3)_2 \cdot 6H_2O$  aqueous solution adopting chronoamperometry at -1.0 V for 10 min. A piece of CF ( $0.5\text{ cm} \times 1\text{ cm}$ ), a SCE, and a Pt plate were used as the working electrode, reference electrode, and counter electrode, respectively.

**Characterizations:** XRD patterns were acquired using a Rigaku X-ray diffractometer

(Ultima IV, Japan) with Cu K $\alpha$  radiation (40 kV, 30 mA). SEM images were captured using a ZEISS scanning electron microscope (Sigma 500, Germany). TEM images were obtained from a Thermo Fisher transmission electron microscope (Talos F200X, America). XPS spectra were recorded employing a Thermo ESCALAB 250Xi spectrometer (Scientific K-Alpha, America) with Al K $\alpha$  radiation (12 kV, 6 mA). Absorbance spectra were measured using a Shimadzu UV-vis spectrophotometer (UV-2600, Japan). In situ mass spectrometry was conducted on a Linglu mass spectrometer (QAS100, China). DEMS was conducted on a mass spectrometer (Linglu QAS100) to in situ analysis of produced intermediates and products. In situ Raman spectra were measured on a HORIBA confocal microscope (LabRAM HR Evolution, France) with a 532 nm laser. In situ attenuated total reflection fourier transform infrared spectroscopy (ATR-FTIR) spectra were recorded on a Thermo Fisher infrared spectrometer (Nicolet™ iS50, America).

**Electrochemical measurements:** The electrochemical performance of NO<sub>3</sub>RR was evaluated on an electrochemical workstation (Chenhua CHI760E, Shanghai) using an H-type cell with three electrodes. Specifically, a piece of CoF<sub>2</sub> NS/CF (the area in contact with the electrolyte was 0.3 cm<sup>2</sup>) was the working electrode. A Pt plate (1.0 cm<sup>2</sup>) and a Hg/HgO electrode served as the counter and reference electrodes, respectively. The electrolyte was 0.1 M NaOH solution with or without 0.1 M NO<sub>3</sub><sup>-</sup>. Initially, linear sweep voltammetry (LSV) was conducted over the potential window from -0.8 to -1.6 V vs.  $E_{\text{Hg/HgO}}$  at a scan rate of 5 mV·s<sup>-1</sup>. LSV was performed until the LSV curves exhibited negligible discrepancies. All recorded potentials were converted to the reversible hydrogen electrode (RHE) scale using the following equation:  $E_{\text{RHE}} = E_{\text{Hg/HgO}} + 0.059\text{pH} + 0.097$ . Chronoamperometry was then conducted at various potentials for 1 h to assess the rate of ammonia production and FE, which were determined as follows:

$$\text{Yield} = C \times V / (A \times t),$$

$$\text{FE} = n \times F \times C \times V / (\text{M.R.} \times Q),$$

where  $C$ ,  $V$ ,  $A$ ,  $t$ ,  $n$ ,  $F$ , M.R., and  $Q$  are the product concentration in the catholyte, catholyte volume (30 mL), geometric area of the electrode (0.3 cm<sup>2</sup>), time (1 h), electron transfer number, the Faraday constant (96485 C·mol<sup>-1</sup>), relative molecular mass of the product, and applied potential, respectively.

DEMS was conducted using an Linglu in-situ mass spectrometer combined with a 760E electrochemical workstation. A small electrolytic cell with a volume of 2 mL was used, and the electrolyte was bubbled with high-purity Ar gas for 30 min to remove O<sub>2</sub> and N<sub>2</sub>. The CoF<sub>2</sub> nanosheet (25 µg) was loaded on a planar conductive film (a dedicated film for in situ detection) to serve as the working electrode. A Pt wire and an Ag/AgCl electrode were used as the counter and reference electrodes, respectively. In situ mass spectrometry was performed simultaneously with chronoamperometry tests at different potentials (-0.1 ~ -0.6 Vvs. RHE). to detect products and intermediates.

Electrochemical in situ Raman experiments were carried out on a LabRAM HR spectrometer with 532 nm laser, a 50× objective, and an acquisition time of 90 s. In an in-house made Raman cell with , a piece of CoF<sub>2</sub> NS/CF, an Hg/HgO, and a Pt wire were used as the working electrode, reference electrode, and the counter electrode, respectively. Then the electrochemical tests using Amperometric i-t technique were performed at 0.1 ~ -0.6 V vs. RHE.

Electrochemical in situ ATR-FTIR tests were recorded on a Nicolet™ iS50 infrared spectrometer using internal reflection mode. The electrochemical experiments were tested in a Pike Veemax III ATR cell. The working electrode was prepared by loading CoF<sub>2</sub> nanosheets (25 µg) on a silicon wafer with Au coating. An Hg/HgO and a Pt wire were used as the reference electrode and the counter electrode, respectively. Amperometric i-t technique was applied at different potentials (OCP, -0.1 ~ -0.6 Vvs. RHE).

**Determination of products:**  $\text{NH}_3$  in the catholyte was quantified using the indophenol blue method. Unless specified otherwise, the electrolyte was diluted by a factor of 50. The color agent was prepared by dissolving 5.0 g of salicylic acid and 5.0 g of sodium citrate in 100 mL of 1.0 M NaOH solution. The oxidizing agent was prepared by diluting 6.0 mL of NaClO (containing 5% available chlorine) to 100 mL in a volumetric flask. The catalyst solution was obtained by adding 0.1 g of  $\text{Na}_2[\text{Fe}(\text{CN})_5\text{NO}] \cdot 2\text{H}_2\text{O}$  to 10 mL of deionized water. Specifically, 2 mL of the color agent, 1 mL of the oxidizing agent, and 200  $\mu\text{L}$  of the catalyst solution were sequentially added to 2 mL of the diluted catholyte. After incubating in the dark for 70 min, the ultraviolet–visible (UV–Vis) absorption spectra were measured in the wavelength range of 800–500 nm.

$\text{NO}_2^-$  was quantified through spectrophotometry using the Griess method. The Griess reagent was formulated by dissolving 0.1 g of  $\text{C}_{12}\text{H}_{14}\text{N}_2 \cdot 2\text{HCl}$ , 1.0 g of sulfonamide, and 2.94 mL of  $\text{H}_3\text{PO}_4$  in 50 mL of  $\text{H}_2\text{O}$ . Unless specified otherwise, the catholyte was diluted by a factor of 50. In a standard colorimetric assay, 1.0 mL of the diluted catholyte and 1.0 mL of the Griess reagent were added into 2.0 mL of  $\text{H}_2\text{O}$ . After a 10-min incubation period, the UV–Vis absorption spectra were measured in the wavelength range of 650–400 nm.

$\text{N}_2\text{H}_4$  was also detected using a colorimetric method. The color agent was prepared by adding 1.99 g of *p*-C<sub>9</sub>H<sub>11</sub>NO (5.99 g) and 10 mL of HCl (37%) into 100 mL of  $\text{C}_2\text{H}_5\text{OH}$ . Thereafter, 2 mL of the undiluted catholyte was added to 2 mL of the color reagent. After 10 min, the UV–Vis absorption spectra were measured within the wavelength range of 500–400 nm.

**DFT calculation methods:** First-principles calculations with spin polarization were conducted using DFT, as implemented in the VASP package.<sup>2</sup> The projector-augmented wave method was used to model the interaction between valence electrons and ionic cores, and the cutoff energy was 450 eV.<sup>3</sup> The Perdew–Burke–Ernzerhof functional with DFT-D3 semi-empirical corrections was utilized to account for the

exchange-correlation effects within the framework of the generalized gradient approximation.<sup>4</sup> A  $\text{Co(OH)}_2(001)$  slab was constructed; the slab and its periodically repeated images were separated by a vacuum space of  $> 15 \text{ \AA}$  to prevent interactions along the  $z$ -direction. The Hubbard model was implemented with an effective on-site Coulomb interaction  $U$  of 3.52 eV for the Co  $3d$  orbital.<sup>5</sup> To optimize the structural configuration, the Brillouin zone was sampled using a  $3 \times 3 \times 1$  grid of special  $k$ -points, implemented through the Monkhorst–Pack scheme.<sup>6</sup> The convergence criteria for forces and total energy were set at 0.02 eV/ $\text{\AA}$  and less than  $1 \times 10^{-5}$  eV, respectively.

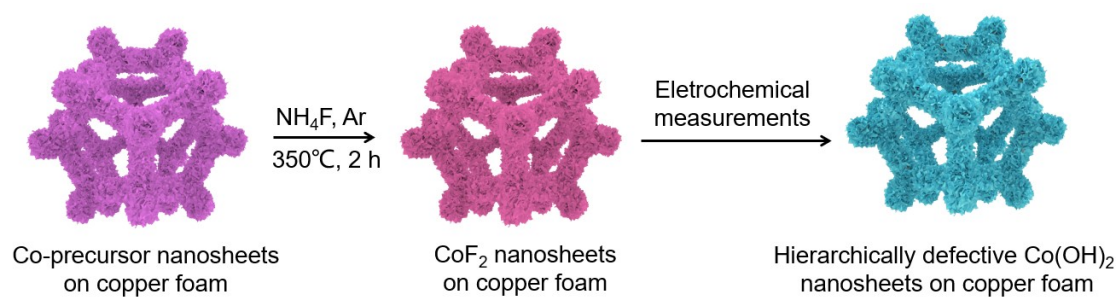

**Scheme 1.** Illustration of the formation of  $\text{Co(OH)}_2$  NS/CF.

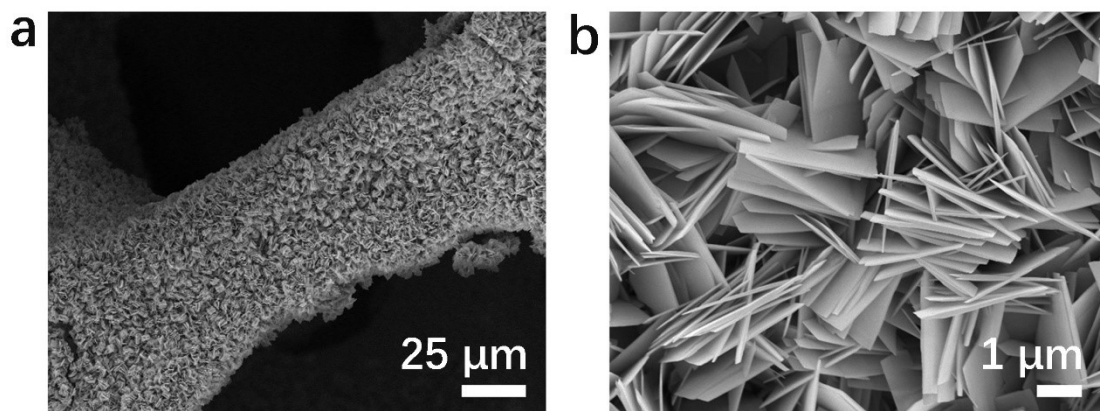

**Fig. S1** (a, b) SEM images of the Co-precursor nanosheets array on CF.

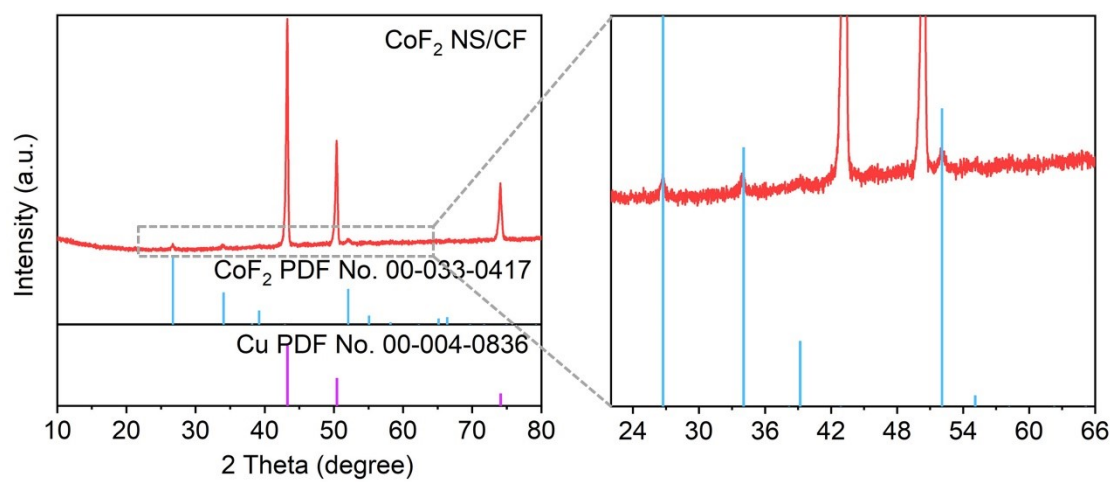

**Fig. S2** XRD pattern of CoF<sub>2</sub> NS/CF.

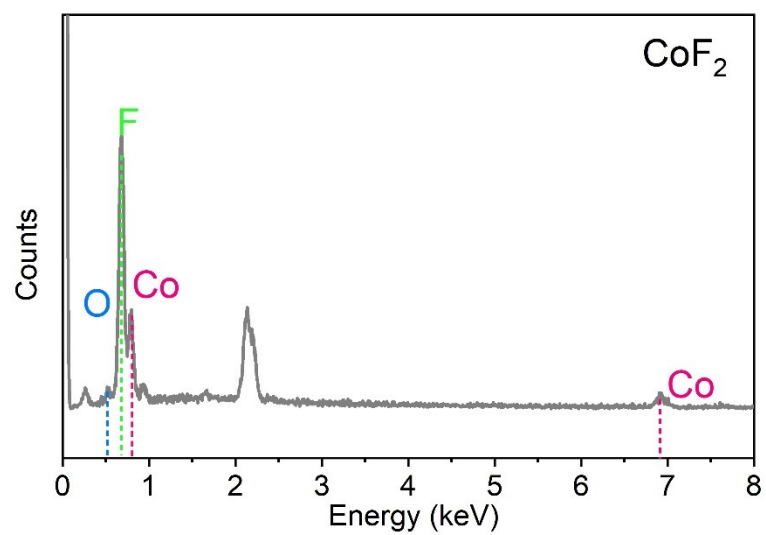

**Fig. S3** EDX spectrum of CoF<sub>2</sub> NS/CF.

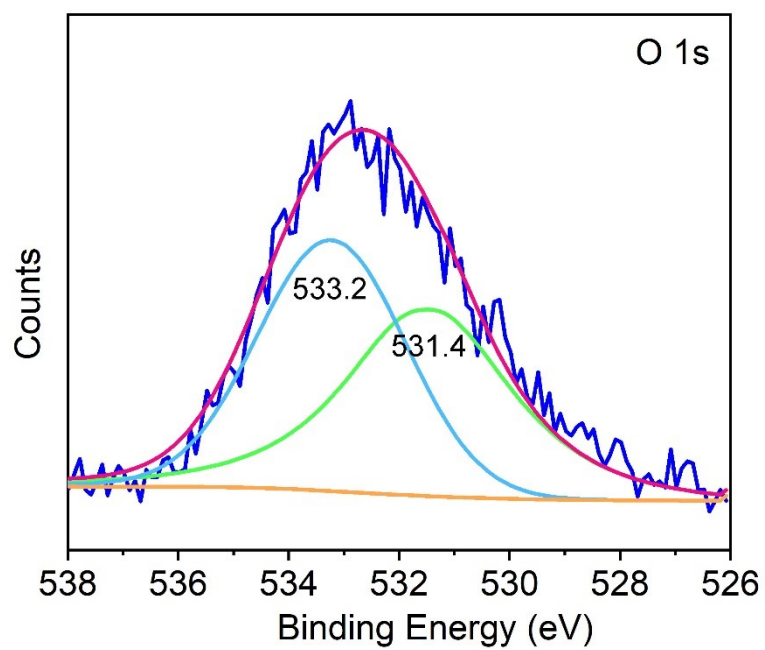

**Fig. S4** XPS spectra of CoF<sub>2</sub> NS/CF in O 1s region of CoF<sub>2</sub> NS/CF.

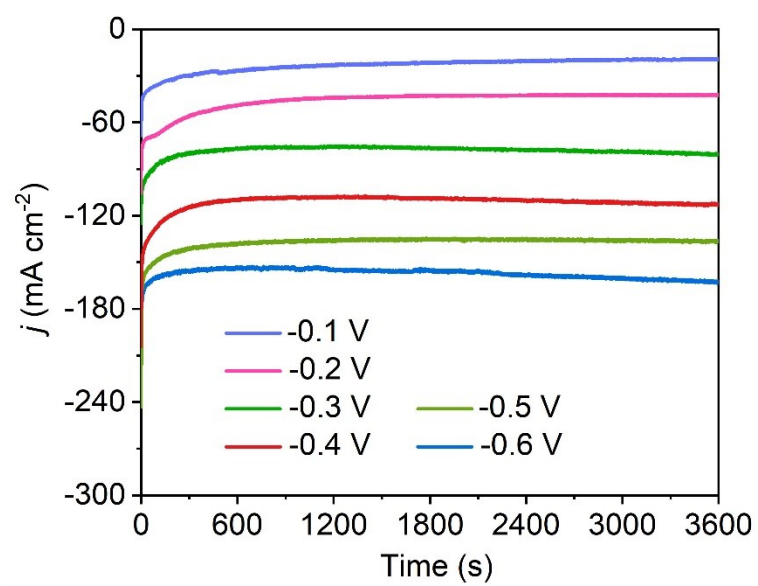

**Fig. S5** Current density-time curves at various applied potentials of CoF<sub>2</sub> NS/CF.

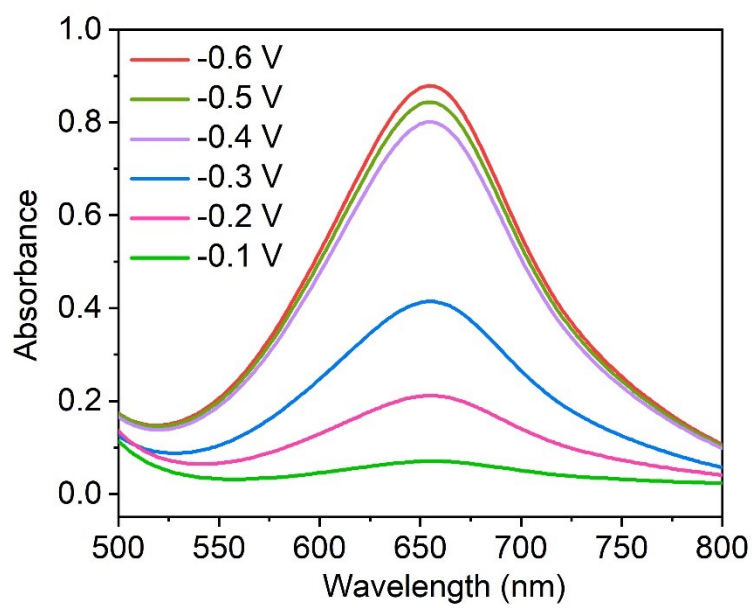

**Fig. S6** UV-Vis absorption spectra for  $\text{NH}_3$  detection at various applied potentials.

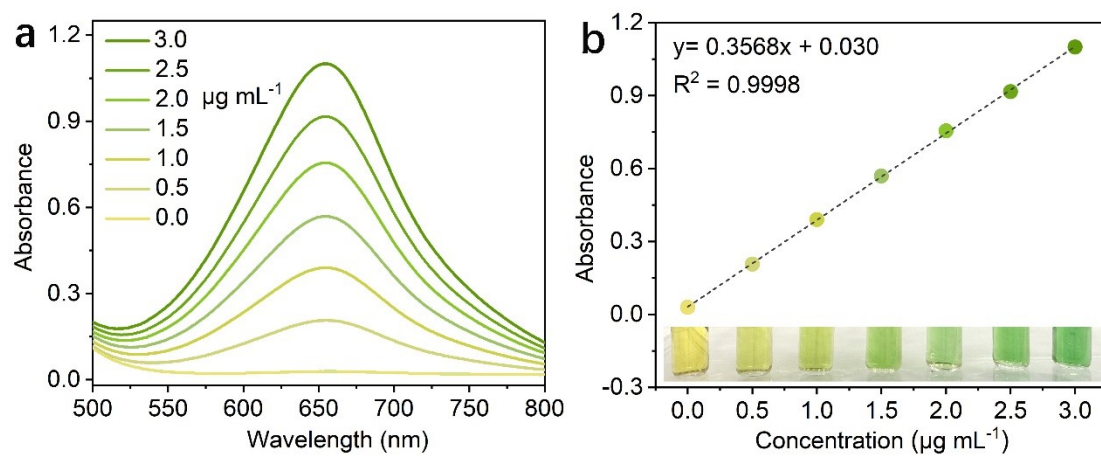

**Fig. S7** (a) UV-Vis spectra of a series of solutions with known  $\text{NH}_3$  concentration and (b) corresponding calibration curve.

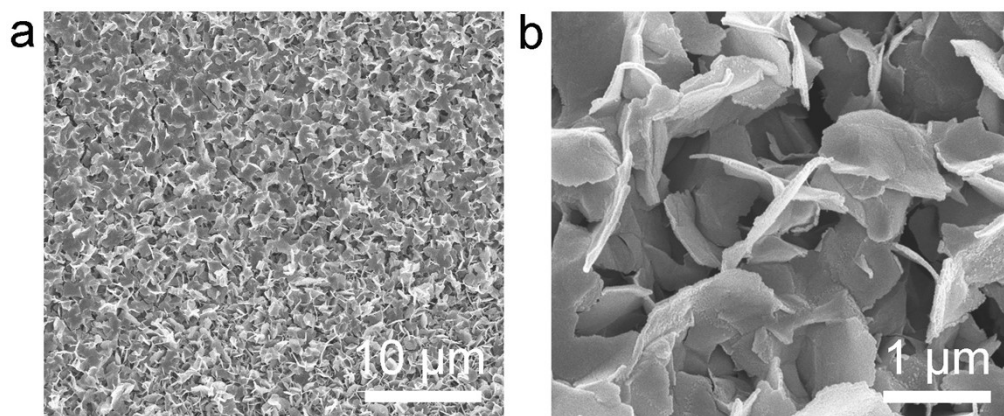

**Fig. S8** (a,b) SEM images of electrodeposited  $\text{Co(OH)}_2$  nanosheets on CF.

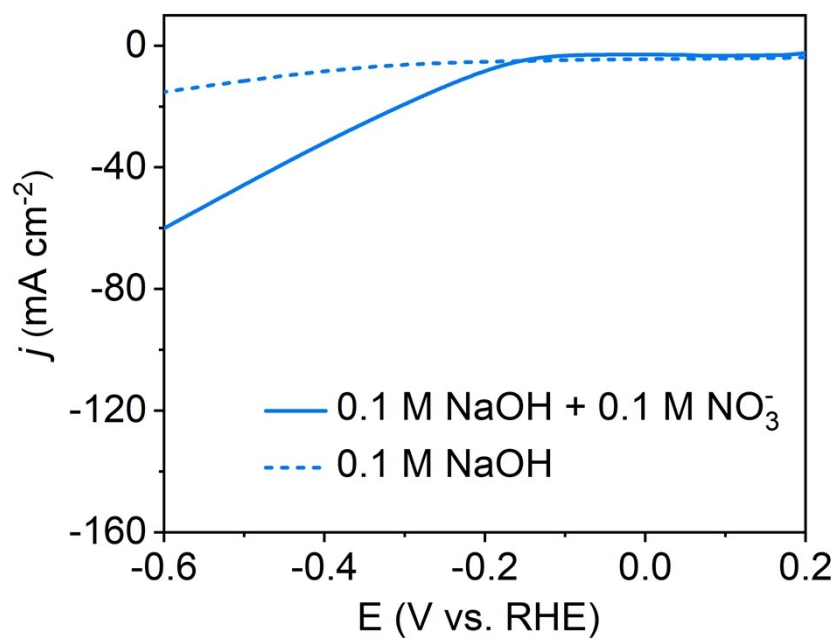

**Fig. S9** LSV curves of electrodeposited Co(OH)<sub>2</sub> NS/CF measured in NaOH with and without NO<sub>3</sub><sup>-</sup>.

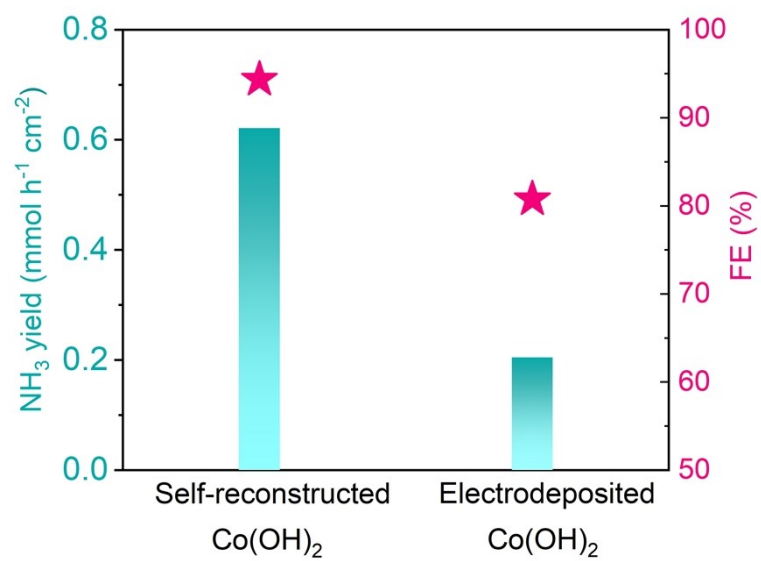

**Fig. S10** NH<sub>3</sub> yields and FEs of self-reconstructed and electrodeposited Co(OH)<sub>2</sub> nanosheets on CF at -0.4 V.

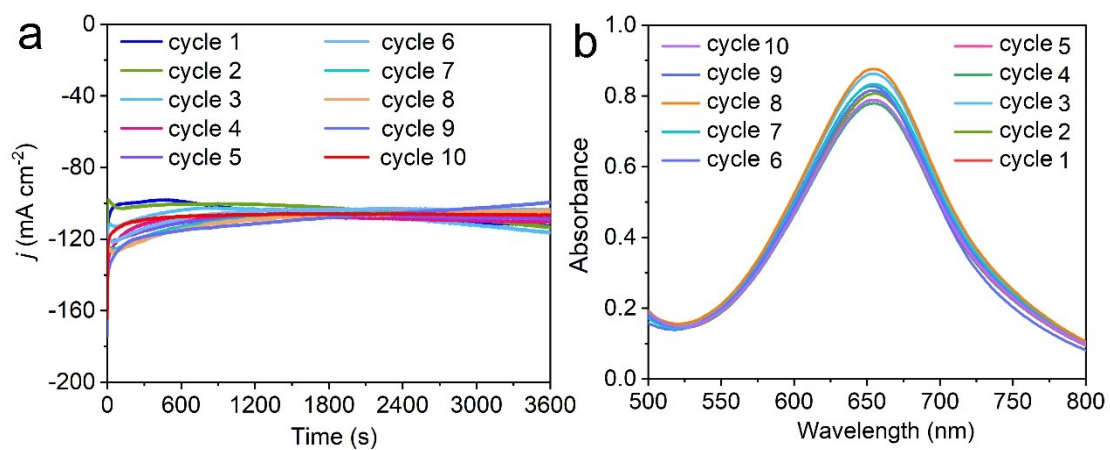

**Fig. S11** (a) Chronoamperometry curves and (b) UV-Vis spectra of the catholytes stained with indophenol indicator for cycling tests.

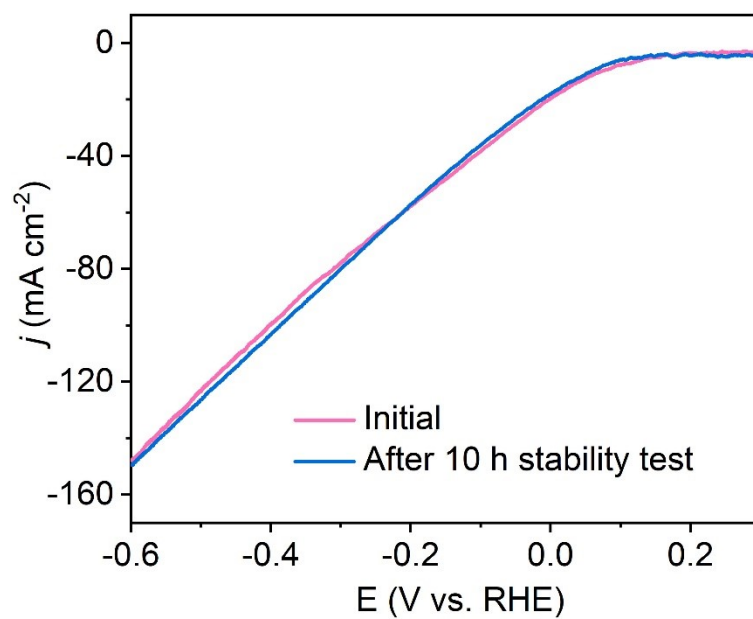

**Fig. S12** LSV curves for CoF<sub>2</sub> NS/CF before and after 10 h consecutive recycling test.

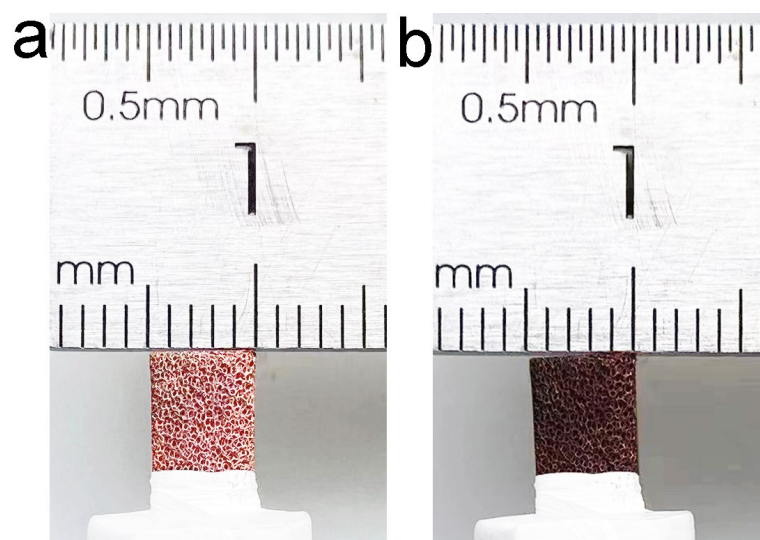

**Fig. S13** Photographs of the working electrode (a) before and (b) after ENRA tests.

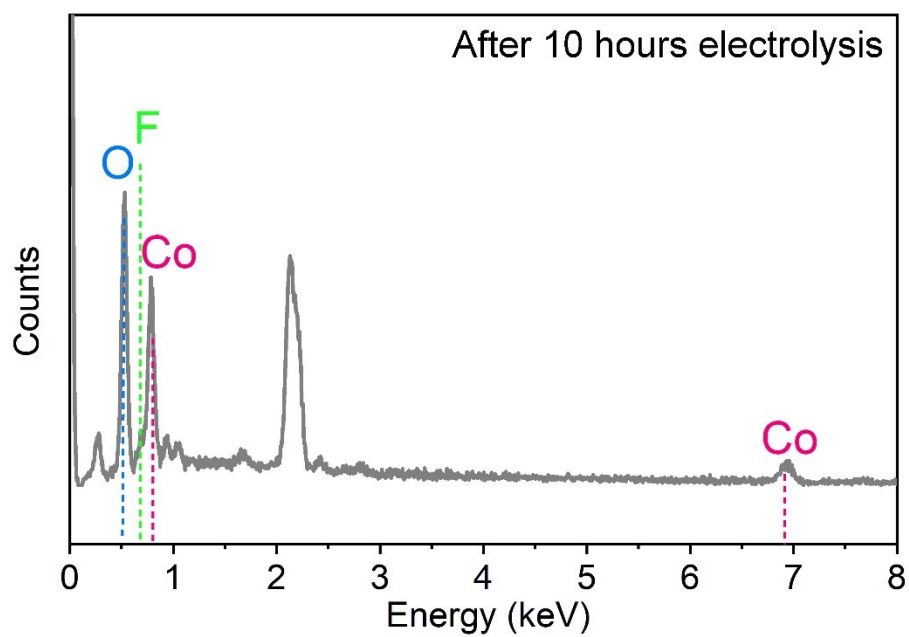

**Fig. S14** EDX spectrum of  $\text{CoF}_2$  NS/CF after 10 h electrolysis.

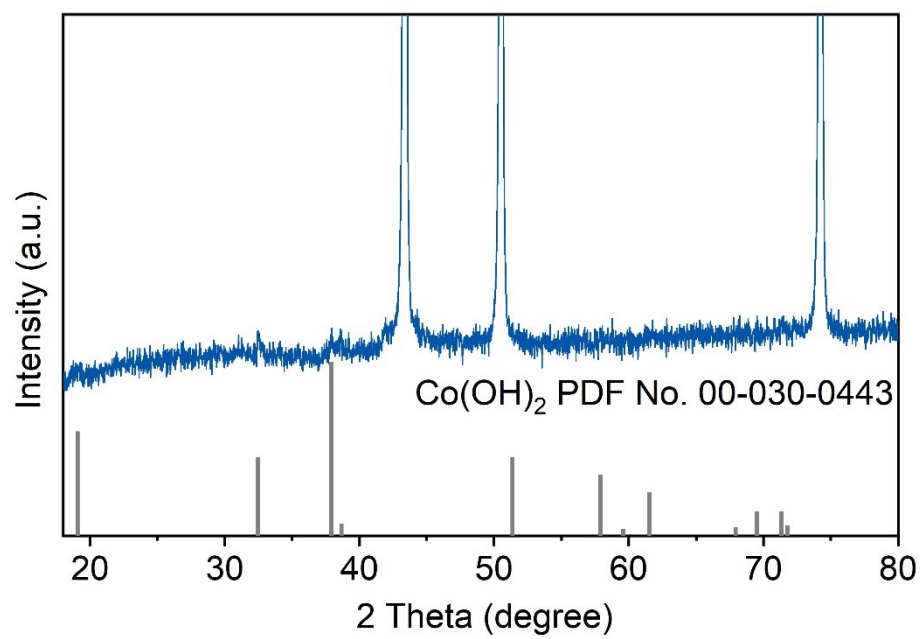

**Fig. S15** XRD pattern of CoF<sub>2</sub> NS/CF post ENRA electrolysis.

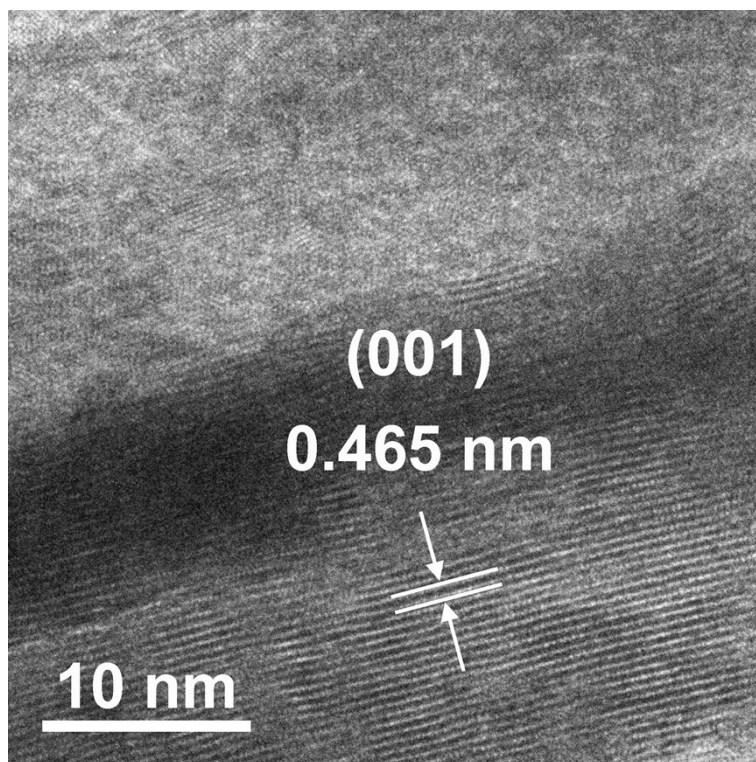

**Fig. S16** High-resolution TEM image of a vertical  $\text{Co(OH)}_2$  nanosheet in Fig. 3c.

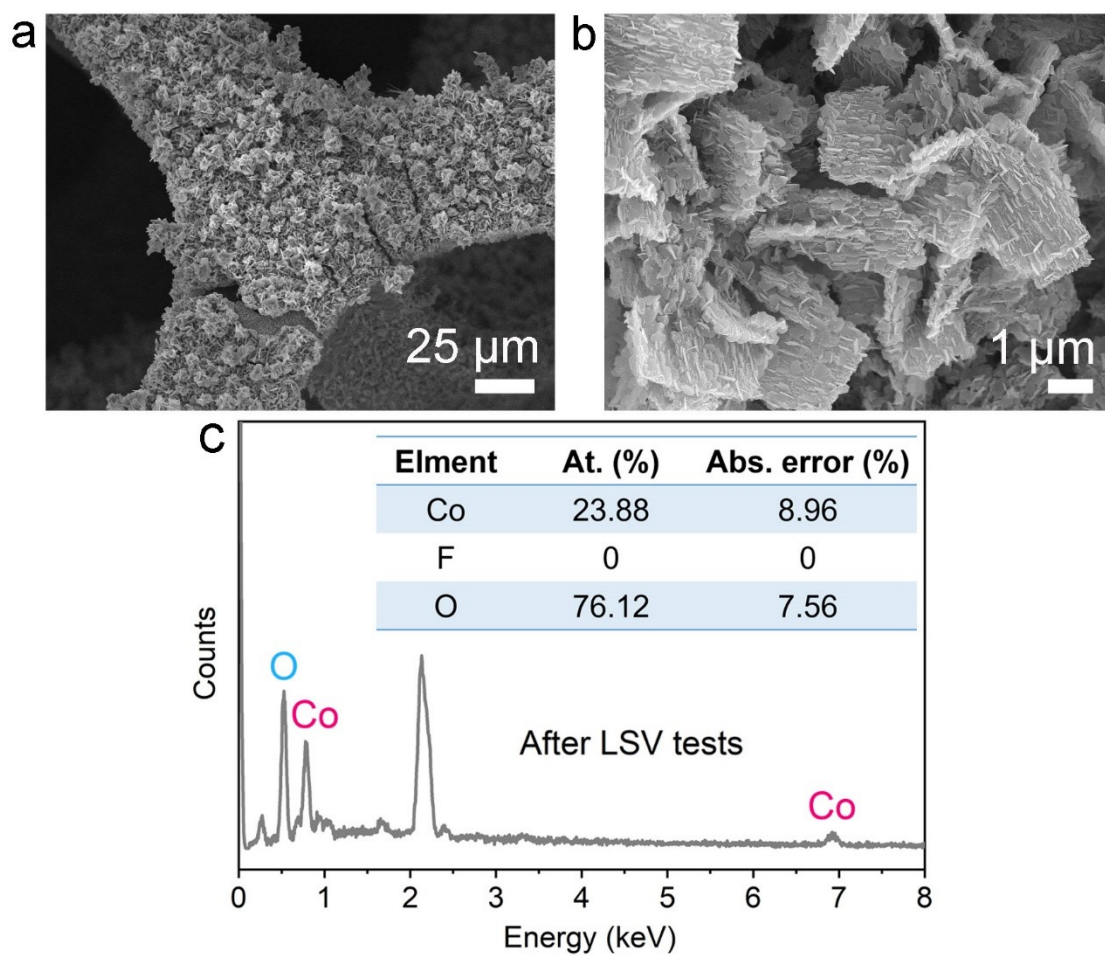

**Fig. S17** (a, b) SEM images and (c) EDX spectrum of  $\text{CoF}_2$  NS/CF after LSV tests.

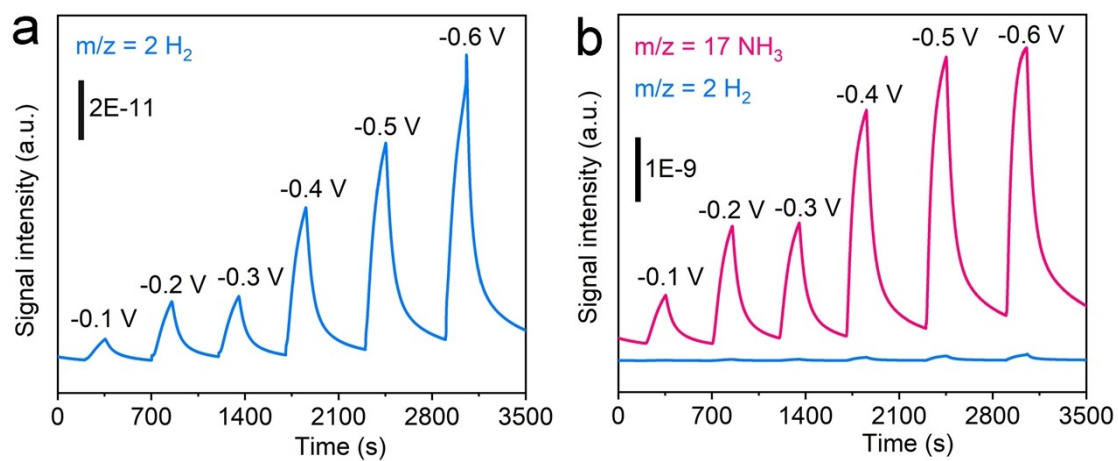

**Fig. S18** DEMS data (a)  $H_2$  spectrum over  $Co(OH)_2$  NS at different potentials; (b)  $H_2$  and  $NH_3$  spectra plotted in one graph for comparison.

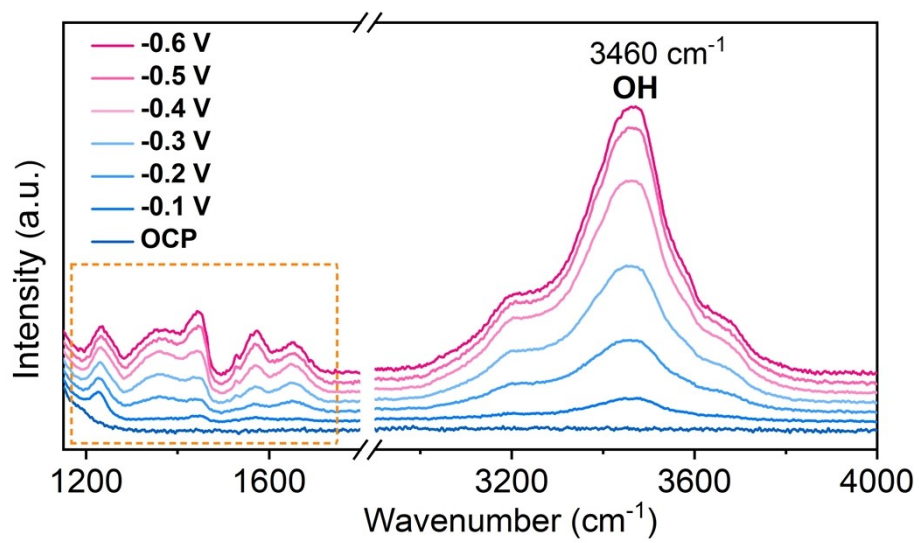

**Fig. S19** In situ FTIR spectra of CoF<sub>2</sub> NS measured during ENRA tests.

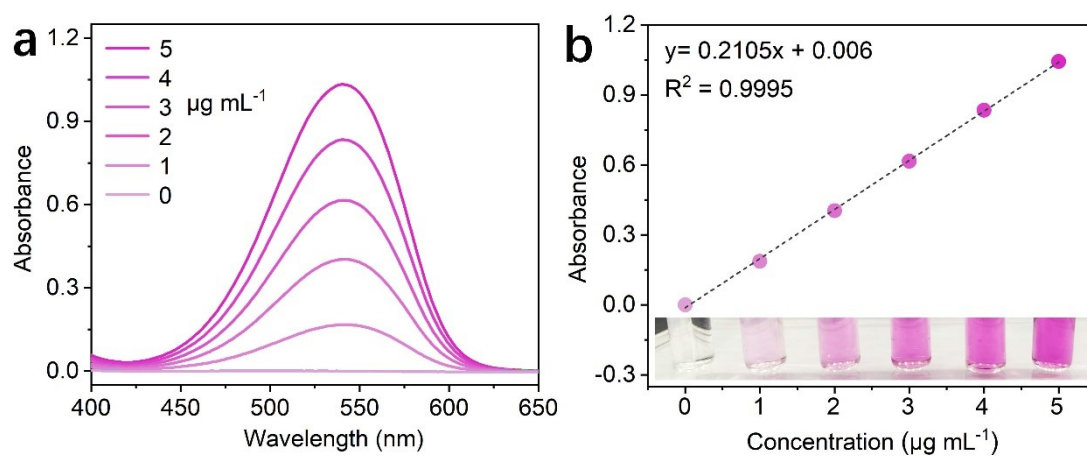

**Fig. S20** (a) UV-Vis spectra of a series of solutions with known  $\text{NO}_2^-$  concentration and (b) corresponding calibration curve.

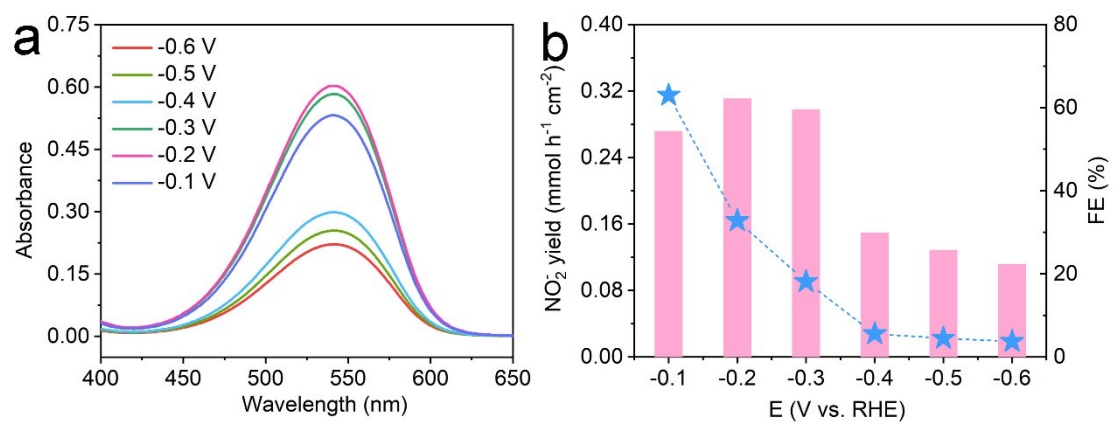

**Fig. S21** (a) UV-Vis spectra of the diluted catholytes for  $\text{NO}_2^-$  detection at different applied potentials.

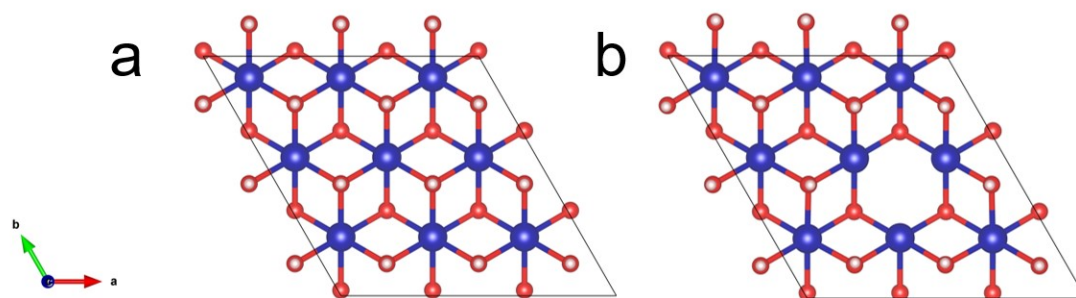

**Fig. S22** Atomic structures of (a) Co(OH)<sub>2</sub>(001) and (b) defective Co(OH)<sub>2</sub>(001).

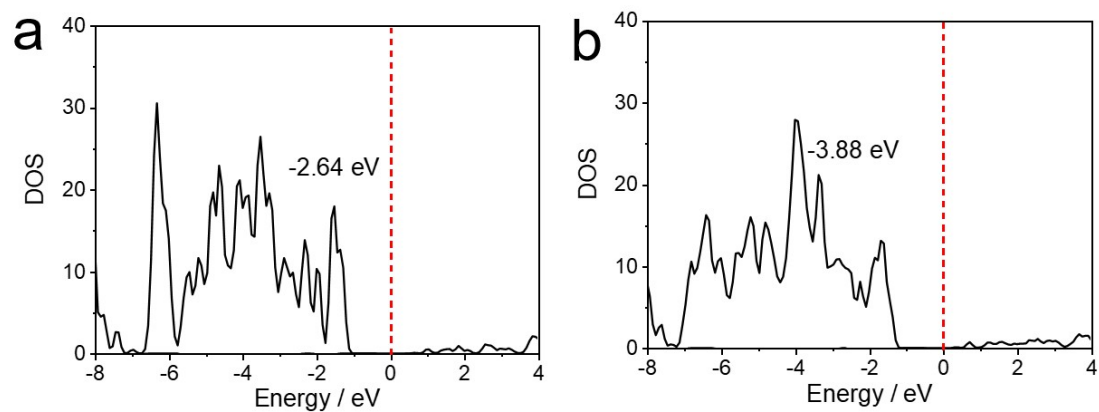

**Fig. S23** DOS of (a)  $\text{Co(OH)}_2(001)$  and (b) defective  $\text{Co(OH)}_2(001)$ .

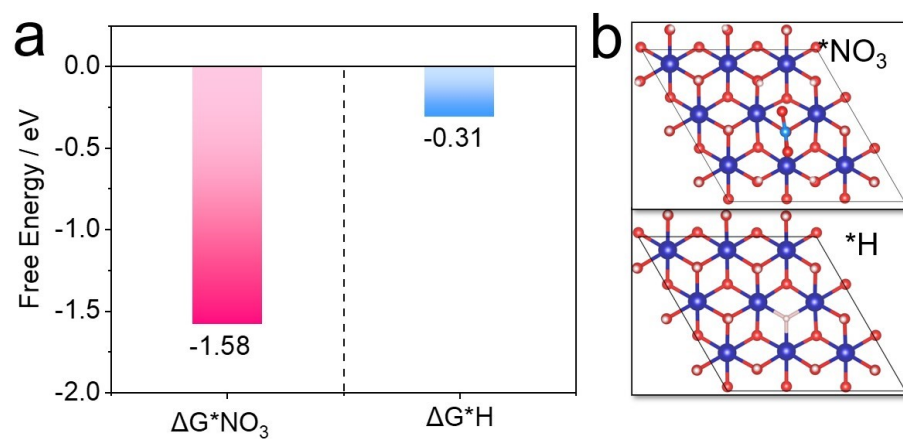

**Fig. S24** Adsorption free energies of  $*NO_3$  and  $*H$  on  $Co(OH)_2$  (001) and the corresponding atomic structures.

**Table S1** ENRA performance comparison of Co(OH)<sub>2</sub> NS/CF with other reported Co-based electrocatalysts.

| Catalyst                                                    | Electrolyte                                                                     | Potential<br>(V vs. RHE) | NH <sub>3</sub> yield<br>(mmol h <sup>-1</sup> cm <sup>-2</sup> ) | FE    | Ref.      |
|-------------------------------------------------------------|---------------------------------------------------------------------------------|--------------------------|-------------------------------------------------------------------|-------|-----------|
| Self-reconstructed<br>Co(OH) <sub>2</sub>                   | 0.1 M NaOH<br>0.1 M NaNO <sub>3</sub>                                           | -0.4                     | 0.62                                                              | 94.3  | This work |
| Electrodeposited<br>Co(OH) <sub>2</sub>                     | 0.1 M NaOH<br>0.1 M NaNO <sub>3</sub>                                           | -0.4                     | 0.20                                                              | 80.7  | This work |
| Y-Co(OH)F                                                   | 0.5 M K <sub>2</sub> SO <sub>4</sub><br>200 mg L <sup>-1</sup> KNO <sub>3</sub> | -1.3 (vs. SCE)           | 0.2149                                                            | 91.81 | [7]       |
| CoFe LDH                                                    | 1.0 M KOH<br>1400 ppm KNO <sub>3</sub>                                          | -0.45                    | 0.93                                                              | 97.68 | [8]       |
| Co(OH) <sub>2</sub><br>(prepared by<br>hydrothermal method) | 1.0 M KOH<br>1400 ppm KNO <sub>3</sub>                                          | -0.45                    | —                                                                 | 85.86 | [8]       |
| Co@CC                                                       | 0.1 M NaOH<br>0.1 M NaNO <sub>3</sub>                                           | -0.8                     | 0.60                                                              | 93.4  | [9]       |
| CoNPs/CF                                                    | 1.0 M KOH<br>0.1 M KNO <sub>3</sub>                                             | -0.2                     | ~0.20                                                             | 92    | [10]      |
| Co/CoO                                                      | 0.1 M PBS<br>500 ppm KNO <sub>3</sub> <sup>-</sup>                              | -0.65                    | 0.2                                                               | 93.8  | [11]      |
| CoO <sub>x</sub>                                            | 0.1 M KOH<br>0.1 M NO <sub>3</sub> <sup>-</sup>                                 | -0.3                     | 0.33                                                              | 93.4  | [12]      |
| NiCo <sub>2</sub> O <sub>4</sub>                            | 0.1 M NaOH<br>0.1 M NaNO <sub>3</sub>                                           | -0.3                     | 0.468                                                             | 99.0  | [13]      |

|                                            |                                                                    |       |                                                                |       |      |
|--------------------------------------------|--------------------------------------------------------------------|-------|----------------------------------------------------------------|-------|------|
| CoAl <sub>2</sub> O <sub>4</sub>           | 0.1 M PBS<br>0.1 M KNO <sub>3</sub>                                | -0.7  | ~0.36                                                          | 92.6  | [14] |
| FeCo <sub>2</sub> O <sub>4</sub>           | 1.0 M KOH<br>20 mM KNO <sub>3</sub>                                | -0.5  | ~0.293                                                         | 95.9  | [15] |
| Reduced Co <sub>3</sub> O <sub>4</sub>     | 0.1 M K <sub>2</sub> SO <sub>4</sub><br>200 ppm NO <sub>3</sub>    | -0.05 | 7.25<br>(mg h <sup>-1</sup> mg <sub>cat.</sub> <sup>-1</sup> ) | 74.8  | [16] |
| Co <sub>2</sub> B/BCN                      | 0.1 M KOH<br>0.1 M KNO <sub>3</sub>                                | -0.5  | 5.73<br>(mg h <sup>-1</sup> mg <sub>cat.</sub> <sup>-1</sup> ) | 96.61 | [17] |
| CoP/TiO <sub>2</sub>                       | 0.1 M NaOH<br>0.1 M NaNO <sub>3</sub>                              | -0.3  | 0.4998                                                         | 95    | [18] |
| Fe-CoS <sub>2</sub>                        | 0.5 M Na <sub>2</sub> SO <sub>4</sub><br>0.1 M NaNO <sub>3</sub>   | -0.6  | 0.63                                                           | 97.5  | [19] |
| CoS <sub>2</sub>                           | 0.5 M Na <sub>2</sub> SO <sub>4</sub><br>0.1 M NaNO <sub>3</sub>   | -0.6  | 0.23                                                           | 67.38 | [19] |
| Co-doped Fe/Fe <sub>2</sub> O <sub>3</sub> | 0.1 M Na <sub>2</sub> SO <sub>4</sub><br>0.036 M NaNO <sub>3</sub> | -0.75 | ~0.088                                                         | 85.2  | [20] |

## References

1. Q. Dong, T. Su, W. Ge, Y. Ren, Y. Liu, W. Wang, Q. Wang and X. Dong, Atomic doping and anion reconstructed CoF<sub>2</sub> electrocatalyst for oxygen evolution reaction, *Adv. Mater. Interfaces*, 2020, **7**, 1901939.
2. H. J. Kresse G, Ab initio molecular-dynamics simulation of the liquid-metal-amorphous-semiconductor transition in germanium, *Phys. Rev. B*, 1994, **49**, 14251–14269.
3. G. Kresse and D. P. Joubert, From ultrasoft pseudopotentials to the projector augmented-wave method, *Phys. Rev. B*, 1999, **59**, 1758–1775.
4. B. K. Perdew JP, Ernzerhof M., Generalized gradient approximation made simple, *Phys. Rev. Lett.*, 1996, **18**, 3865–3868.

5. H. Jin, S. Mao, G. Zhan, F. Xu, X. Bao and Y. Wang, Fe incorporated  $\alpha$ -Co(OH)<sub>2</sub> nanosheets with remarkably improved activity towards the oxygen evolution reaction, *Phys. Rev. B*, 2017, **5**, 1078–1084.
6. H. J. Monkhorst and J. D. Pack, Special points for Brillouin-zone integrations, *Phys. Rev. B*, 1976, **13**, 5188–5192.
7. Z. Yu, T. Ren, J. Xie, H. Yu, K. Deng, Z. Wang, H. Wang, L. Wang and Y. Xu, Yttrium atomically incorporated into Co(OH)F nanowires enables efficient electrochemical reduction of nitrate to ammonia, *Chem. Commun.*, 2023, **59**, 13875–13878.
8. F. Du, J. Li, C. Wang, J. Yao, Z. Tan, Z. Yao, C. Li and C. Guo, Active sites-rich layered double hydroxide for nitrate-to-ammonia production with high selectivity and stability, *Chem. Eng. J*, 2022, **434**, 134641.
9. T. Xie, X. Li, J. Li, J. Chen, S. Sun, Y. Luo, Q. Liu, D. Zhao, C. Xu, L. Xie and X. Sun, Co nanoparticles decorated corncob-derived biomass carbon as an efficient electrocatalyst for nitrate reduction to ammonia, *Inorg. Chem.*, 2022, **61**, 14195–14200.
10. Y. Qian, J. Lv, Y. Zhong, X. Liu, X. Li, Y. Peng, J. Yan and A. Wu, Efficient electrocatalytic nitrate reduction using 3D copper foam-supported Co hexagonal nanoparticles in a membrane electrode assembly, *Int. J. Hydrogen Energy*, 2024, **64**, 178–185.
11. Y. Yu, C. Wang, Y. Yu, Y. Wang and B. Zhang, Promoting selective electroreduction of nitrates to ammonia over electron-deficient Co modulated by rectifying Schottky contacts, *Sci. China Chem.*, 2020, **63**, 1469-1476.
12. J. Wang, C. Cai, Y. Wang, X. Yang, D. Wu, Y. Zhu, M. Li, M. Gu and M. Shao, Electrocatalytic reduction of nitrate to ammonia on low-cost ultrathin CoOx nanosheets, *ACS Catal.*, 2021, **11**, 15135–15140.
13. Q. Liu, L. Xie, J. Liang, Y. Ren, Y. Wang, L. Zhang, L. Yue, T. Li, Y. Luo, N. Li, B. Tang, Y. Liu, S. Gao, A. A. Alshehri, I. Shakir, P. O. Agboola, Q. Kong, Q.

- Wang, D. Ma and X. Sun, Ambient ammonia synthesis via electrochemical reduction of nitrate enabled by NiCo<sub>2</sub>O<sub>4</sub> nanowire array, *Small*, 2022, **18**, 2106961.
14. Z. Deng, J. Liang, Q. Liu, C. Ma, L. Xie, L. Yue, Y. Ren, T. Li, Y. Luo, N. Li, B. Tang, A. Ali Alshehri, I. Shakir, P. O. Agboola, S. Yan, B. Zheng, J. Du, Q. Kong and X. Sun, High-efficiency ammonia electrosynthesis on self-supported Co<sub>2</sub>AlO<sub>4</sub> nanoarray in neutral media by selective reduction of nitrate, *Chem. Eng. J.*, 2022, **435**, 135104.
  15. J. Li, D. Zhao, L. Zhang, L. Yue, Y. Luo, Q. Liu, N. Li, A. A. Alshehri, M. S. Hamdy, Q. Li and X. Sun, A FeCo<sub>2</sub>O<sub>4</sub> nanowire array enabled electrochemical nitrate conversion to ammonia, *Chem. Commun.*, 2022, **58**, 4480-4483.
  16. D. Lu, T. Liu, J. Han, J. Zhao and H. Wang, Yolk-shell composite oxides with binuclear Co(II) sites toward low-overpotential nitrate reduction to ammonia, *Chem. Eng. J.*, 2023, **477**, 146896.
  17. L. Hu, D. Zhao, C. Liu, Y. Liang, D. Zheng, S. Sun, Q. Li, Q. Liu, Y. Luo, Y. Liao, L. Xie and X. Sun, Amorphous CoB nanoarray as a high-efficiency electrocatalyst for nitrite reduction to ammonia, *Inorg. Chem. Front.*, 2022, **9**, 6075–6079.
  18. Z. Deng, C. Ma, X. Fan, Z. Li, Y. Luo, S. Sun, D. Zheng, Q. Liu, J. Du, Q. Lu, B. Zheng and X. Sun, Construction of CoP/TiO<sub>2</sub> nanoarray for enhanced electrochemical nitrate reduction to ammonia, *Mater. Today Phys.*, 2022, **28**, 100854.
  19. N. Zhang, G. Wang, G. Zhang, K. Chen and K. Chu, Electrochemical nitrate-to-ammonia reduction over atomic Fe-dopants incorporated in CoS<sub>2</sub>, *Chem. Eng. J.*, 2023, **474**, 145861.
  20. S. Zhang, M. Li, J. Li, Q. Song and X. Liu, High-ammonia selective metal organic framework derived Co-doped Fe/Fe<sub>2</sub>O<sub>3</sub> catalysts for electrochemical nitrate reduction, *PNAS*, 2022, **119**, e2115504119.
